# Supplementary material
Source: PubMed Central journal article supplement (PMC5560030)
Supplement: NIHMS885013-supplement-Supplement.pdf [file NIHMS885013-supplement-Supplement.pdf]

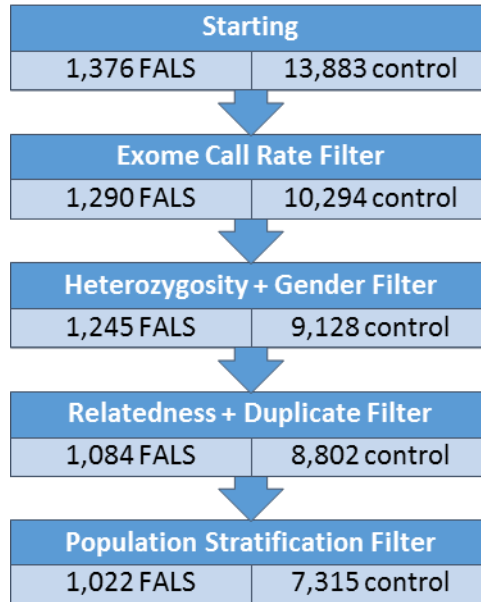

### Supplementary Figure 1

#### Quality control of FALS discovery cohort.

Exome sequences were obtained for 1,376 FALS cases and 13,883 controls. Samples were excluded in the event of exome-wide call rate <70%, outlying heterozygosity ( $F < -0.1$  or  $F > 0.1$ ), SNP-predicted and reported gender discrepancy, detectable relatedness to another retained sample (kinship coefficient  $\geq 0.0442$ ;  $\geq 3^{\text{rd}}$ -degree relationship), outlying ancestry with respect to FALS samples in pairwise tests of population concordance (exhibits  $P < 1 \times 10^{-4}$  in tests with  $\geq 10\%$  of FALS cases; **Supplementary Fig. 2**) or outlying ancestry with respect to FALS samples in subsequent principal-components analysis (eigenvector value  $> 4$  s.d. from FALS mean along any of principal components 1–4).

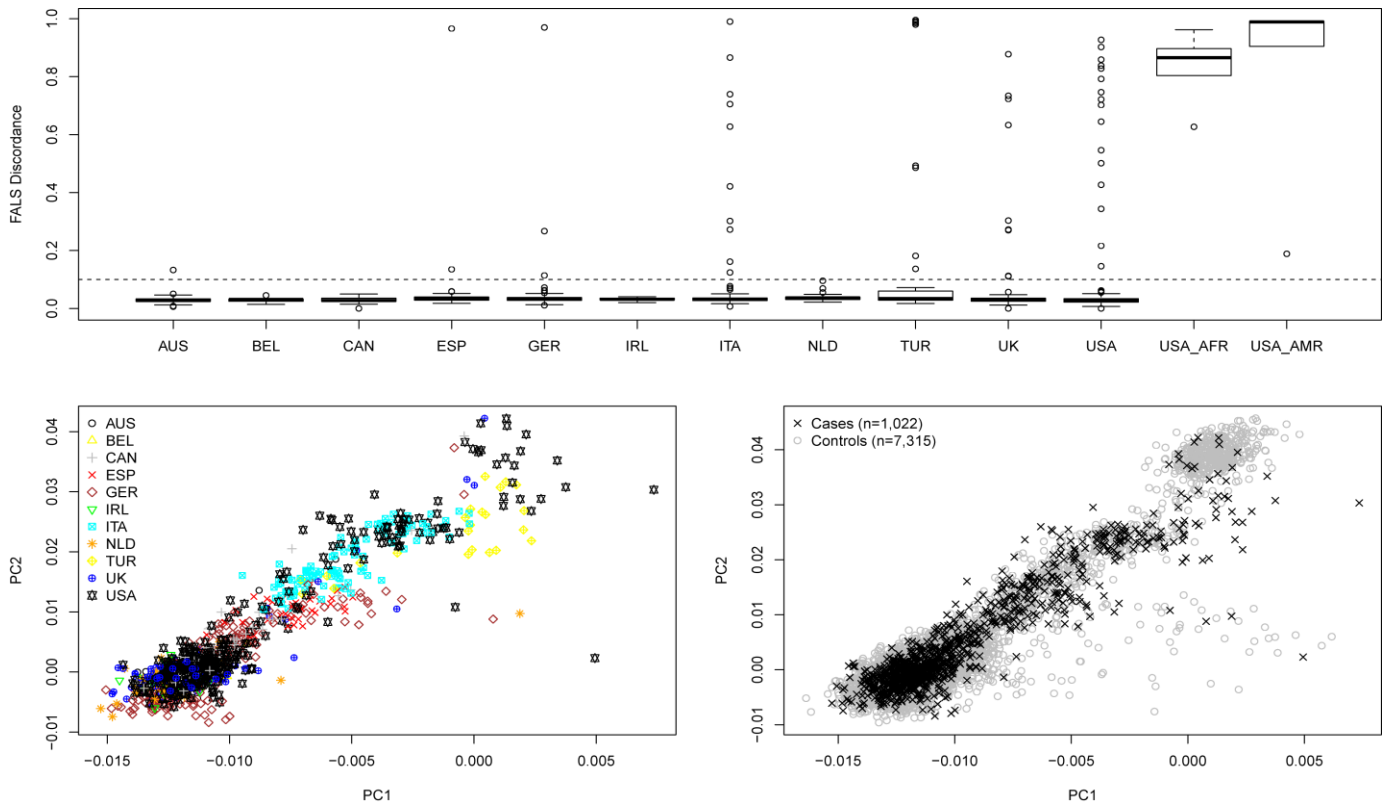

**Supplementary Figure 2**

**Stratification analysis of FALS discovery cohort.**

(a) Results from first round of population outlier filtering. The y axis denotes the proportion of FALS samples for which a given test sample exhibits significant population discordance ( $P < 1.0 \times 10^{-4}$  in pairwise population concordance testing). The x axis displays corresponding geographical labels for FALS cases. Horizontal dotted line denotes 10% FALS discordance threshold; all cases and controls falling above this line were removed during the first round of stratification filtering. (b) Distribution of FALS samples along eigenvectors 1 and 2 following principal-components analysis of the quality-control-filtered FALS discovery cohort. (c) Distribution of cases and controls along eigenvectors 1 and 2 following principal-components analysis of the quality-control-filtered FALS discovery cohort. AUS, Australia; BEL, Belgium; CAN, Canada; ESP, Spain; GER, Germany; IRL, Ireland; ITA, Italy; NLD, Netherlands; TUR, Turkey; UK, United Kingdom; USA, United States; USA\_AFR, African American; USA\_AMR, admixed American.

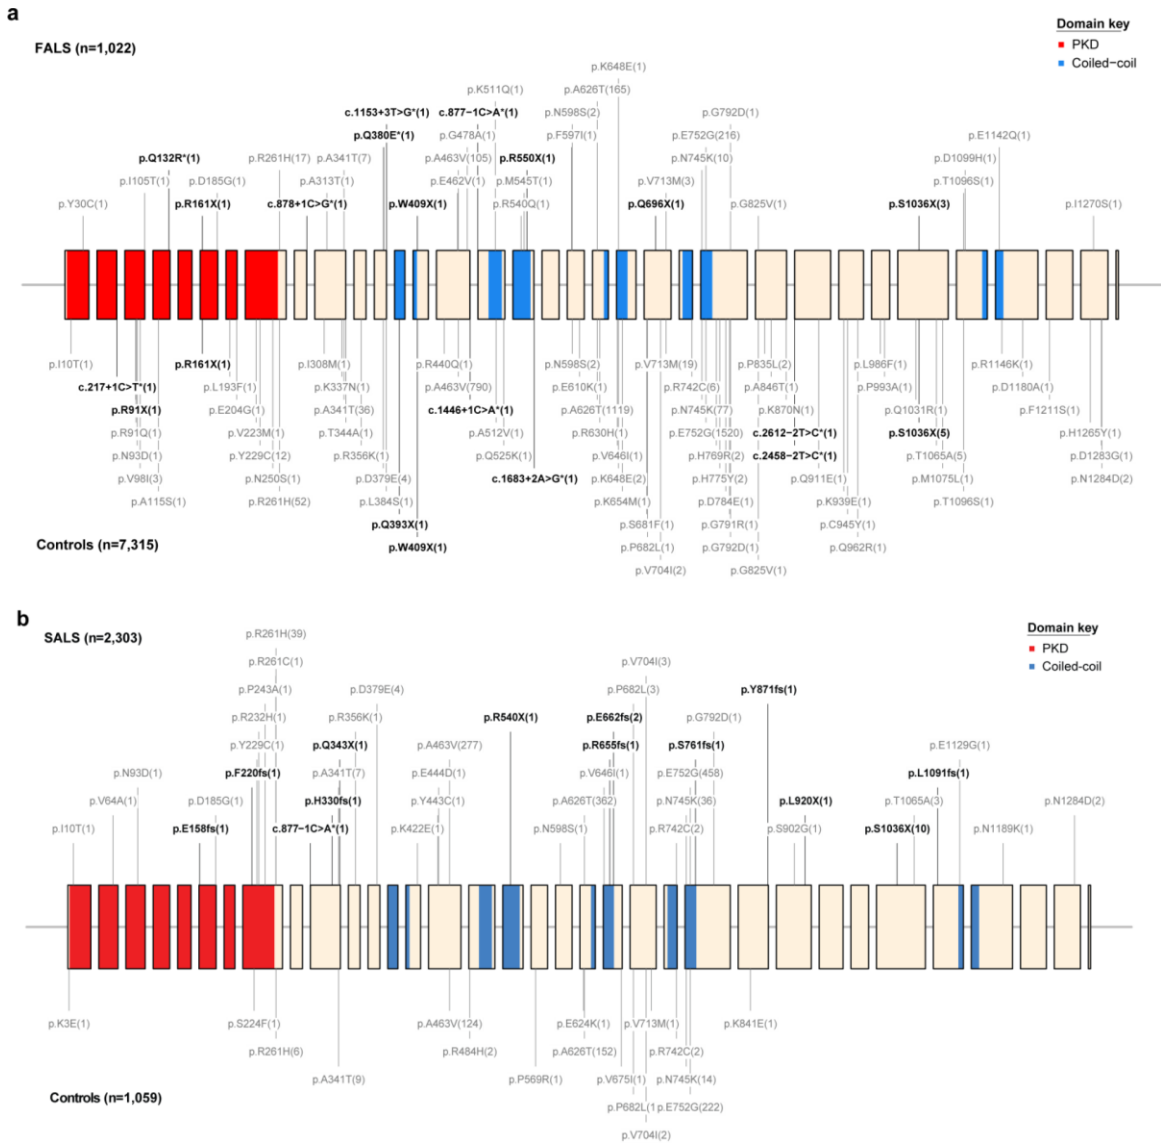

### Supplementary Figure 3

Distribution of *NEK1* variants.

(a,b) Observed case-control distribution of *NEK1* variants in FALS (a) and SALS (b) cohorts. LOF variants are highlighted in black; missense variants are labeled in gray. HGVS descriptions are followed by case/control carrier counts in parentheses. Predicted splice-altering variants are indicated with an asterisk.

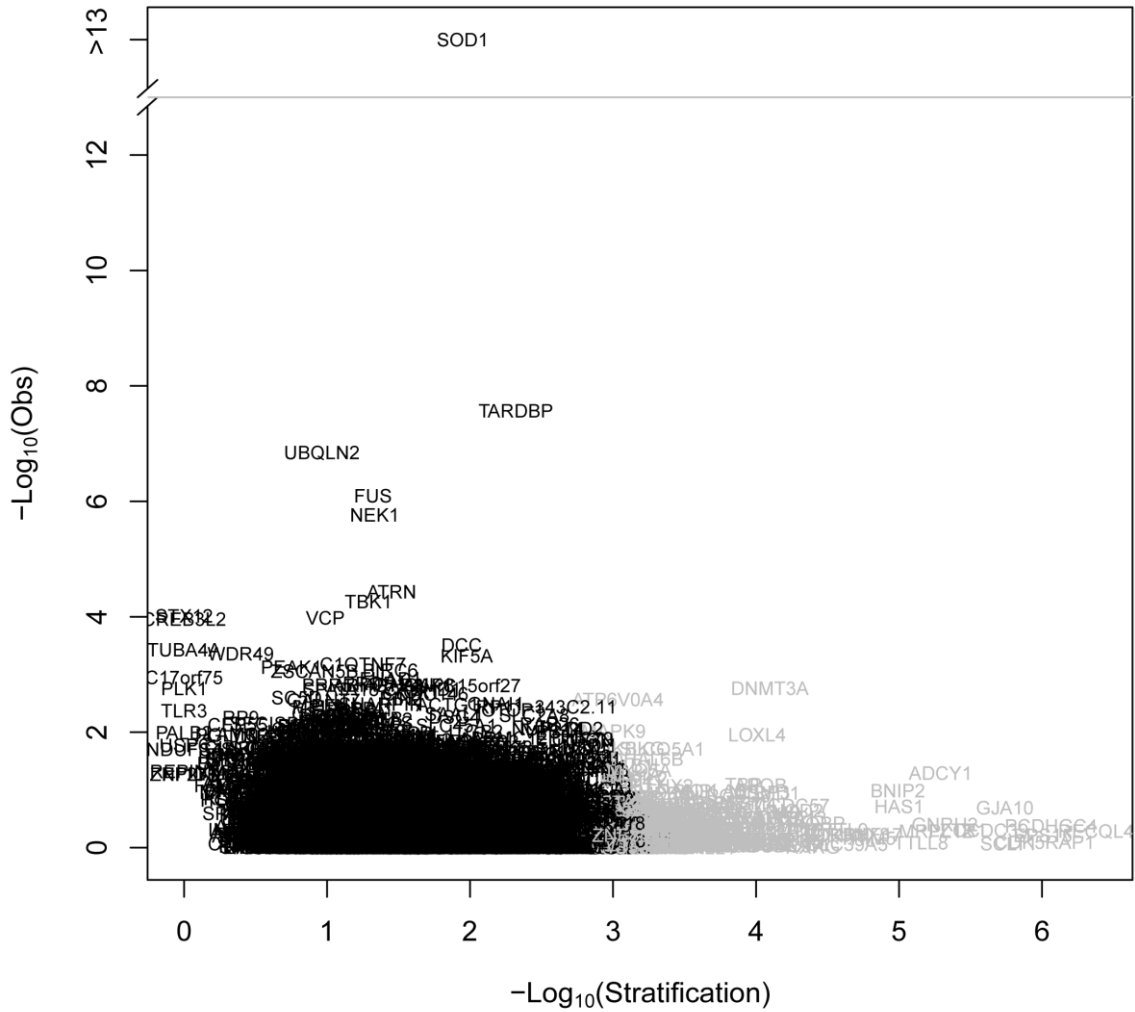

**Supplementary Figure 4**

**Control-control analyses.**

To identify loci potentially subject to confounding bias in FALS RVB analyses, RVB analyses were performed across all known potential sources of heterogeneity in the FALS control cohort. This involved dividing controls into 28 distinct pseudo case-control groups on the basis of sequencing center and associated project to identify loci showing association with non-ALS-related data, population or phenotypic stratifiers. The y axis denotes  $P$  values observed during ALS-gene-trained RVB testing in FALS versus controls. The x axis denotes minimum  $P$  value observed during ALS-gene-trained RVB testing in the 28 pseudo case-control cohorts. Genes shown in gray achieve  $P < 1 \times 10^{-3}$  for possible confounder association. Known and candidate ALS genes show no confounder association.

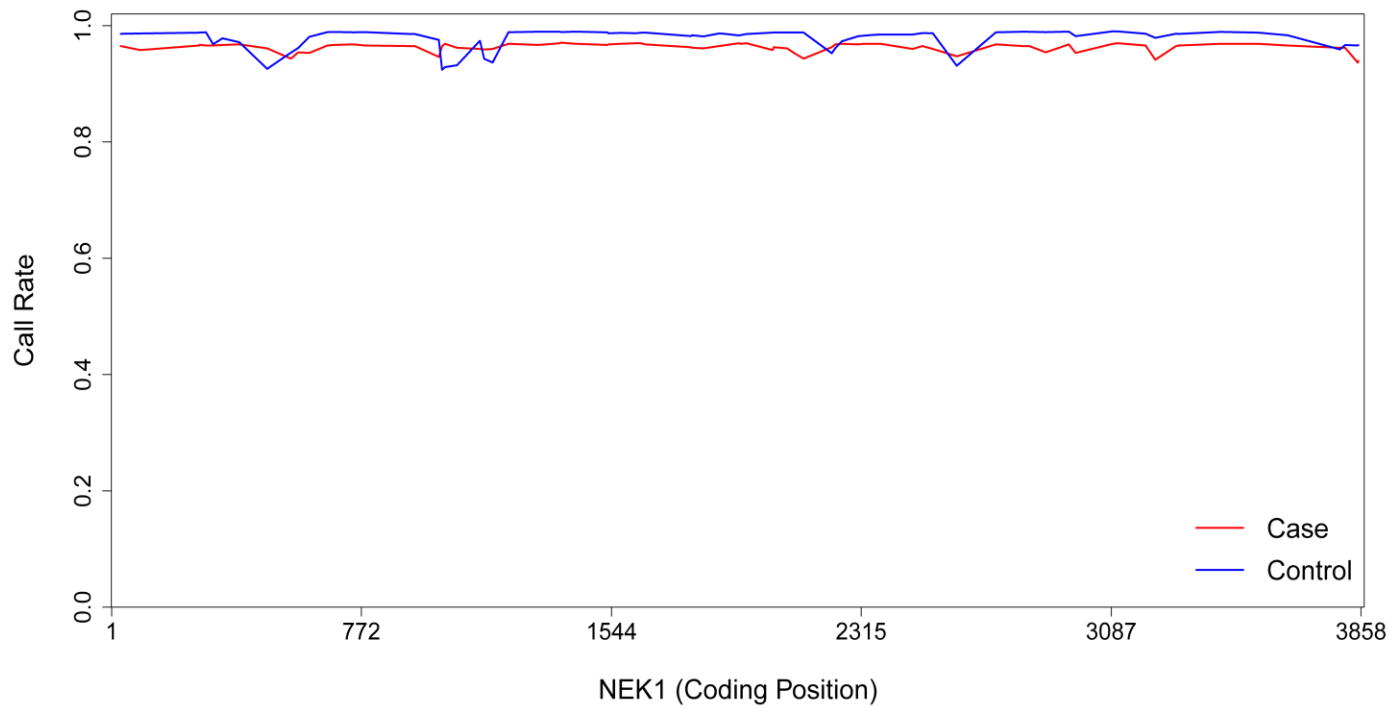

**Supplementary Figure 5**

***NEK1* discovery cohort coverage.**

Plot of variant call rate across the *NEK1* protein-coding region in cases versus controls.

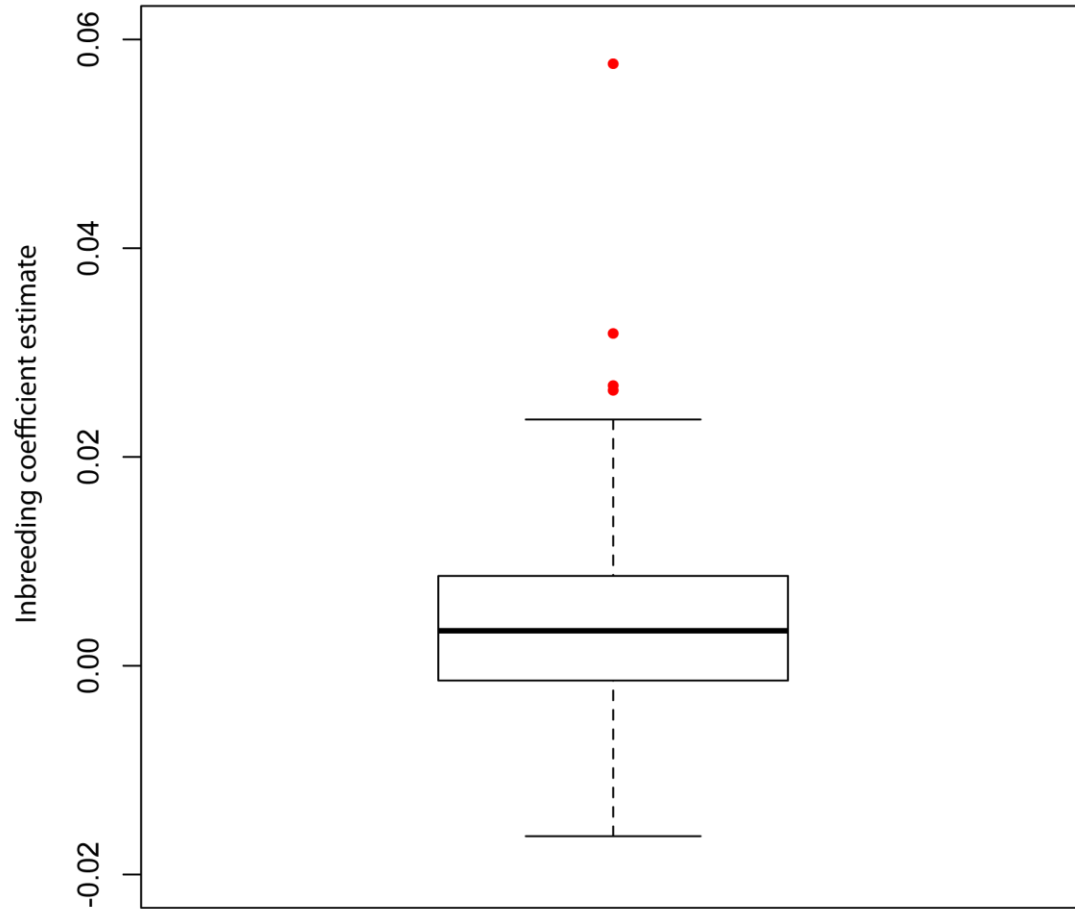

**Supplementary Figure 6**

**Inbreeding coefficients from Dutch whole-genome sequencing cohort.**

Four ALS patients sampled from an isolated community in the Netherlands can be seen to exhibit elevated coefficients of inbreeding (shown in red) relative to a larger panel of Dutch genome sequences ( $n = 1,861$ ). Box plots show cohort median, interquartile range, 2.5% quantile and 97.5% quantile.

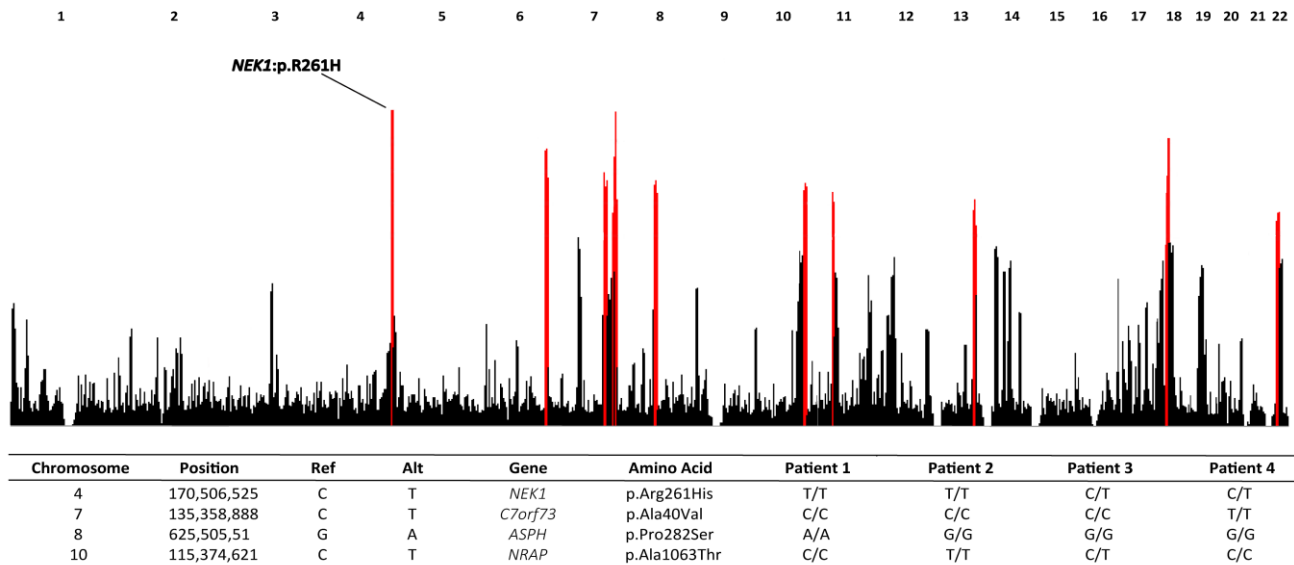

### Supplementary Figure 7

Autozygosity mapping identifies *NEK1* p.Arg261His as a candidate ALS variant.

Whole-genome sequencing followed by autozygosity mapping with allowed genetic heterogeneity identified ten runs of homozygosity present in one or more of four SALS patients from an isolated Dutch community (top). These regions contained four variants where at least one of the four patients was homozygous and where MAF was less than 0.01 in the 1000 Genomes Project, the NHLBI Exome Sequencing Project and ExAC (bottom). *NEK1* p.Arg261His is the only variant identifiable in all patients and the only variant for which multiple homozygous genotypes were observed.

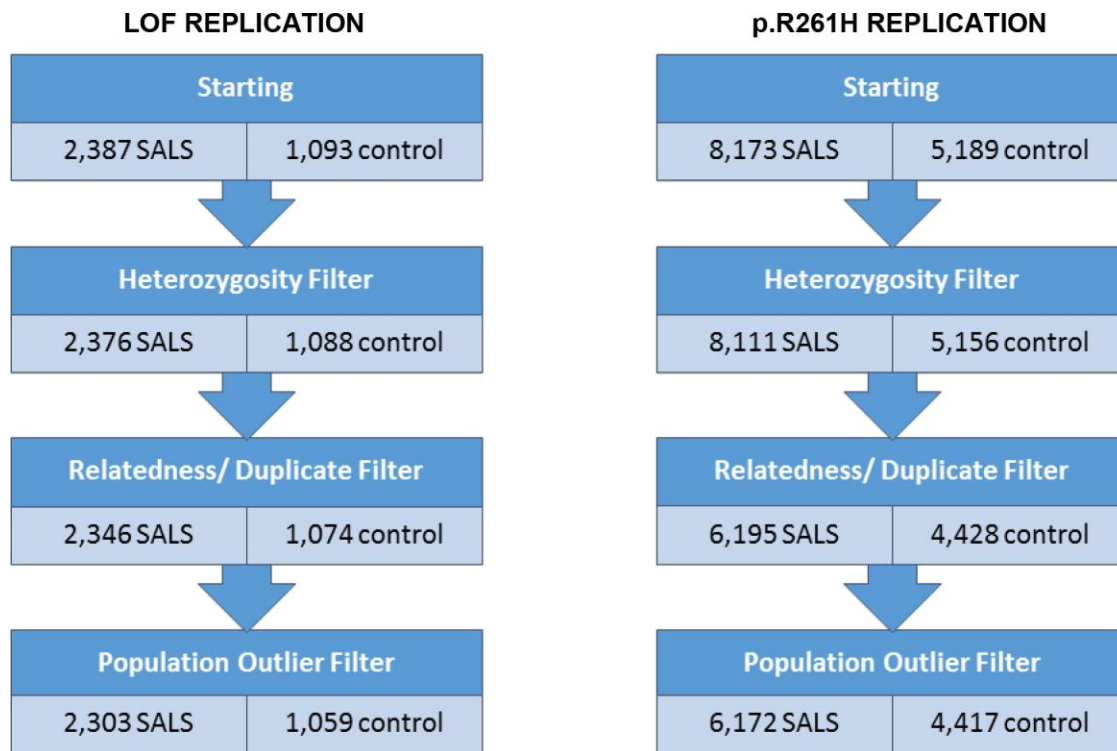

**Supplementary Figure 8**

**Quality control of *NEK1* LOF and p.R261H SALS replication cohorts.**

Full *NEK1* sequencing was performed for 2,387 SALS cases and 1,093 matched controls. p.Arg261His genotypes were obtained for 8,173 SALS cases and 5,189 controls (inclusive of 2,387 SALS cases and 1,093 controls with full *NEK1* sequencing). Samples were excluded in the event of outlying heterozygosity ( $F < -0.1$  or  $F > 0.1$ ), SNP-predicted and reported gender discrepancy, detectable relatedness to a sample from the FALS cohort or retained sample from SALS replication cohort (kinship coefficient  $> 0.0884$ ;  $\leq 2$ rd-degree relationship), outlying ancestry as assessed by identity-by-state distance to the fifth nearest neighbor ( $> 3$  s.d. from group mean) or outlying ancestry as assessed by principal-components analysis (eigenvector value  $> 4$  s.d. from group mean along any of principal components 1–4).



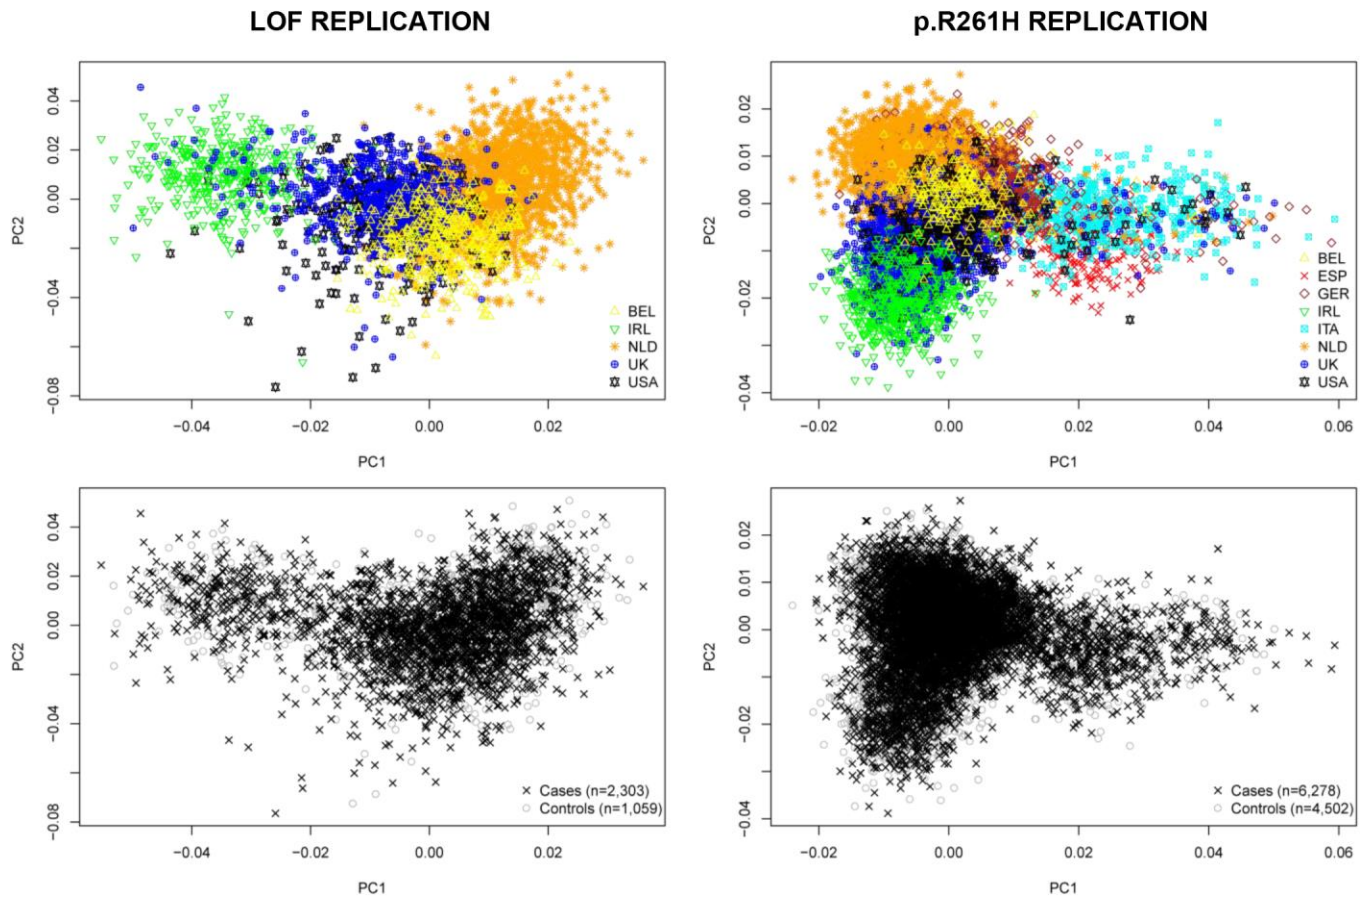

**Supplementary Figure 9**

**Stratification analysis of SALS replication cohorts.**

(a,b) Distribution of cases and controls along eigenvectors 1 and 2 following principal-components analysis of the quality-control-filtered *NEK1* LOF replication cohort. (c,d) Distribution of cases and controls along eigenvectors 1 and 2 following principal-components analysis of the quality-control-filtered *NEK1* p.Arg261His replication cohort. BEL, Belgium; ESP, Spain; GER, Germany; IRL, Ireland; ITA, Italy; NLD, Netherlands; UK, United Kingdom; USA, United States.
